# Supplementary material
Source: PubMed Central journal article supplement (PMC8580201)
Supplement: NIHMS1703494-supplement-1.pdf [file NIHMS1703494-supplement-1.pdf]

Supplementary Table 1. Detailed response information on level of support for each policy

| Country              | Response Option  | Menthol Ban | Additive Ban | Nicotine Standard | Legal Age 21+ | Pictorial Warning |
|----------------------|------------------|-------------|--------------|-------------------|---------------|-------------------|
|                      |                  | N (%)       | N (%)        | N (%)             | N (%)         | N (%)             |
| <b>Canada</b>        | Strongly Support | 230 (9.80)  | 351 (15.00)  | 588 (26.38)       | 695 (30.29)   | NA                |
|                      | Support          | 396 (16.74) | 559 (25.32)  | 930 (41.57)       | 818 (37.58)   | NA                |
|                      | Oppose           | 635 (29.63) | 593 (27.09)  | 244 (10.33)       | 325 (14.74)   | NA                |
|                      | Strongly Oppose  | 377 (17.46) | 311 (13.93)  | 136 (6.51)        | 163 (7.13)    | NA                |
|                      | Refused          | 15 (0.66)   | 13 (0.53)    | 8 (0.27)          | 8 (0.27)      | NA                |
|                      | Don't Know       | 567 (25.71) | 393 (18.12)  | 314 (14.95)       | 211 (9.99)    | NA                |
|                      | Total            | 2220 (100)  | 2220 (100)   | 2220 (100)        | 2220 (100)    | NA                |
| <b>United States</b> | Strongly Support | 211 (7.22)  | 285 (12.21)  | 376 (17.91)       | 504 (24.52)   | 260 (9.53)        |
|                      | Support          | 303 (11.43) | 440 (22.29)  | 706 (35.84)       | 673 (35.18)   | 495 (23.63)       |
|                      | Oppose           | 498 (29.56) | 488 (26.64)  | 293 (16.62)       | 296 (17.54)   | 464 (26.82)       |
|                      | Strongly Oppose  | 459 (24.56) | 340 (18.52)  | 159 (8.38)        | 195 (10.76)   | 305 (17.13)       |
|                      | Refused          | 19 (1.55)   | 9 (0.74)     | 23 (1.10)         | 17 (1.43)     | 20 (1.09)         |
|                      | Don't Know       | 360 (25.69) | 288 (19.61)  | 293 (20.16)       | 165 (10.56)   | 306 (21.80)       |
|                      | Total            | 1850 (100)  | 1850 (100)   | 1850 (100)        | 1850 (100)    | 1850 (100)        |
| <b>England</b>       | Strongly Support | 171 (5.19)  | 303 (10.01)  | 548 (18.89)       | 718 (25.14)   | NA                |
|                      | Support          | 349 (9.91)  | 597 (19.66)  | 1092 (37.96)      | 1065 (36.93)  | NA                |
|                      | Oppose           | 849 (29.92) | 788 (26.38)  | 414 (12.89)       | 499 (17.13)   | NA                |
|                      | Strongly Oppose  | 656 (23.23) | 462 (16.61)  | 236 (7.13)        | 252 (7.89)    | NA                |
|                      | Refused          | 14 (0.42)   | 13 (0.46)    | 16 (0.45)         | 10 (0.22)     | NA                |
|                      | Don't Know       | 841 (31.33) | 717 (26.88)  | 574 (22.68)       | 336 (12.68)   | NA                |
|                      | Total            | 2880 (100)  | 2880 (100)   | 2880 (100)        | 2880 (100)    | NA                |
| <b>Australia</b>     | Strongly Support | 72 (5.25)   | 180 (14.28)  | 227 (18.57)       | 327 (25.52)   | NA                |
|                      | Support          | 110 (8.14)  | 269 (20.03)  | 496 (38.14)       | 468 (36.95)   | NA                |
|                      | Oppose           | 316 (27.88) | 304 (25.21)  | 185 (17.01)       | 196 (16.09)   | NA                |
|                      | Strongly Oppose  | 251 (23.5)  | 156 (16.61)  | 87 (7.48)         | 83 (9.18)     | NA                |
|                      | Refused          | 7 (0.38)    | 3 (0.25)     | 7 (0.6)           | 5 (0.37)      | NA                |
|                      | Don't Know       | 459 (34.84) | 303 (23.63)  | 213 (18.2)        | 136 (11.89)   | NA                |
|                      | Total            | 1215 (100)  | 1215 (100)   | 1215 (100)        | 1215 (100)    | NA                |

Note: Absolute frequencies are unweighted, percentages are weighted.

NA: not applicable since questions about pictorial HWLs were only asked of US respondents

**Support vs. Oppose (excluding Don't Know).**

|                                                        |                                            | <b>Menthol Ban</b> | <b>Additive Ban</b> | <b>Nicotine Standard</b> | <b>Legal Age 21+</b> | <b>Pictorial Warning</b> |
|--------------------------------------------------------|--------------------------------------------|--------------------|---------------------|--------------------------|----------------------|--------------------------|
| <b>Variable</b>                                        | <b>Comparison</b>                          | <b>aOR 95% CI</b>  | <b>aOR 95% CI</b>   | <b>aOR 95% CI</b>        | <b>aOR 95% CI</b>    | <b>aOR 95% CI</b>        |
| Country                                                | US vs Canada                               | 0.88 (0.69, 1.12)  | 1.00 (0.80, 1.24)   | 0.52 (0.41, 0.66)        | 0.69 (0.56, 0.86)    |                          |
|                                                        | England vs Canada                          | 0.52 (0.43, 0.64)  | 0.79 (0.66, 0.94)   | 0.79 (0.65, 0.96)        | 0.88 (0.74, 1.05)    |                          |
|                                                        | Australia vs. Canada                       | 0.49 (0.36, 0.67)  | 0.80 (0.62, 1.02)   | 0.58 (0.44, 0.77)        | 0.87 (0.68, 1.13)    |                          |
|                                                        | England vs. US                             | 0.60 (0.47, 0.77)  | 0.79 (0.64, 0.98)   | 1.52 (1.22, 1.90)        | 1.28 (1.04, 1.57)    |                          |
|                                                        | Australia vs. US                           | 0.56 (0.40, 0.79)  | 0.80 (0.61, 1.05)   | 1.12 (0.84, 1.50)        | 1.27 (0.96, 1.67)    |                          |
|                                                        | Australia vs. England                      | 0.94 (0.68, 1.30)  | 1.01 (0.78, 1.31)   | 0.74 (0.56, 0.97)        | 0.99 (0.77, 1.28)    |                          |
| Gender                                                 | Female vs Male                             | 0.72 (0.58, 0.83)  | 1.03 (0.89, 1.20)   | 1.52 (1.29, 1.79)        | 1.22 (1.05, 1.42)    | 0.98 (0.69, 1.40)        |
| Age                                                    | 25-39 vs 18-24                             | 1.24 (0.93, 1.66)  | 1.16 (0.87, 1.54)   | 1.54 (1.15, 2.07)        | 2.14 (1.65, 2.78)    | 0.70 (0.42, 1.16)        |
|                                                        | 40-54 vs 18-24                             | 1.13 (0.85, 1.50)  | 1.40 (1.07, 1.84)   | 1.50 (1.13, 2.00)        | 2.48 (1.94, 3.16)    | 0.46 (0.28, 0.76)        |
|                                                        | 55+ vs 18-24                               | 0.94 (0.71, 1.24)  | 1.54 (1.18, 2.01)   | 1.80 (1.36, 2.36)        | 2.38 (1.87, 3.02)    | 0.38 (0.24, 0.59)        |
| HSI                                                    | 3+ vs 0-2                                  | 0.69 (0.58, 0.83)  | 0.76 (0.65, 0.88)   | 0.77 (0.65, 0.92)        | 0.97 (0.83, 1.13)    | 0.66 (0.46, 0.93)        |
| Vaping Status <sup>2</sup>                             | Former vs Current                          | 0.70 (0.52, 0.95)  | 0.89 (0.70, 1.14)   | 1.14 (0.87, 1.48)        | 1.02 (0.79, 1.31)    | 0.94 (0.58, 1.55)        |
|                                                        | Never vs Current                           | 0.94 (0.78, 1.14)  | 1.27 (1.07, 1.51)   | 1.12 (0.93, 1.35)        | 0.94 (0.80, 1.11)    | 1.34 (0.92, 2.01)        |
| Intention to Quit <sup>3</sup>                         | > 6 months vs. ≤ 6 months                  | 0.54 (0.45, 0.65)  | 0.61 (0.52, 0.72)   | 0.51 (0.43, 0.61)        | 0.56 (0.47, 0.66)    | 0.39 (0.27, 0.55)        |
| Menthol <sup>4</sup>                                   | Tobacco only vs. Menthol or Another Flavor | 2.26 (1.78, 2.87)  | 2.25 (1.83, 2.75)   |                          |                      |                          |
| Perceptions about Harmfulness of Nicotine <sup>5</sup> | More Harmful vs Not Very Harmful           |                    |                     | 2.10 (1.78, 2.48)        |                      |                          |
